# Supplementary material for: A Zn2+-coordinated boronate dipyrrin as a chemodosimeter toward hydrogen peroxide
Source: Royal Society of Chemistry journal article supplement (doi:10.1039/c7tc00405b), 2017-01-01
Supplement: c7tc00405b1.pdf [file c7tc00405b1.pdf]

## Electronic Supporting Information

### A Zn<sup>2+</sup>-coordinated boronate dipyrin as a chemodosimeter toward hydrogen peroxide

Kaori Sakakibara, Yuki Takahashi, Ryuhei Nishiyabu and Yuji Kubo\*

Department of Applied Chemistry, Graduate School of Urban Environmental Sciences, Tokyo Metropolitan University, 1-1 Minami-ohsawa, Hachioji, Tokyo 192-0397, Japan  
E-mail; yujik@tmu.ac.jp

#### Table of contents

|                                                                                                                                                                                                                      |      |
|----------------------------------------------------------------------------------------------------------------------------------------------------------------------------------------------------------------------|------|
| <b>Fig. S1</b> Change in the absorbance spectra of <b>1</b> upon adding incremental amount of Zn(OAc) <sub>2</sub> in EtOH.                                                                                          | SI-2 |
| <b>Fig. S2</b> ESI-MS spectra of the EtOH solution of <b>1</b> in the presence of 3 equiv. of Zn (OAc) <sub>2</sub> .                                                                                                | SI-2 |
| <b>Fig. S3</b> FAB-MS spectra of solid isolated from the EtOH solution of <b>1</b> and Zn(OAc) <sub>2</sub> .                                                                                                        | SI-3 |
| <b>Fig. S4</b> Time-course analysis of absorption spectra of <b>Zn-12</b> after adding H <sub>2</sub> O <sub>2</sub> in EtOH/CHCl <sub>3</sub> (1:1 v/v).                                                            | SI-3 |
| <b>Fig. S5</b> Change in absorption intensity of <b>1</b> at 581 nm and 597 nm as a function of time in the presence of Zn(OAc) <sub>2</sub> after adding an excess amount of H <sub>2</sub> O <sub>2</sub> in EtOH. | SI-4 |
| <b>Fig. S6</b> ESI-MS spectra of the EtOH solution of <b>1</b> and Zn(OAc) <sub>2</sub> in 12 h after adding of H <sub>2</sub> O <sub>2</sub> in EtOH.                                                               | SI-4 |
| <b>Fig. S7</b> ESI-MS spectra of the EtOH solution of <b>1</b> in the presence of 3 equiv. of Zn (OAc) <sub>2</sub> when 5 hours passed after adding H <sub>2</sub> O <sub>2</sub> .                                 | SI-5 |
| <b>Fig. S8</b> Time-dependent change in absorption intensity of <b>1</b> with Zn(OAc) <sub>2</sub> by adding H <sub>2</sub> O <sub>2</sub> in the presence of TBAOH.                                                 | SI-5 |
| <b>Fig. S9</b> A plot of a change in absorption intensity of <b>1</b> in the presence of Zn(OAc) <sub>2</sub> as a function of H <sub>2</sub> O <sub>2</sub> concentration added in EtOH.                            | SI-6 |
| <b>Fig. S10</b> A plot of a change in fluorescence intensity of <b>1</b> in the presence of Zn(OAc) <sub>2</sub> as a function of H <sub>2</sub> O <sub>2</sub> concentration added in EtOH.                         | SI-6 |
| <b>Fig. S11</b> Colorimetric response of <b>1</b> and Zn <sup>2+</sup> -coated filter paper exposed to varying amounts of H <sub>2</sub> O <sub>2</sub> vapor.                                                       | S1-7 |
| <b>Fig. S12</b> <sup>13</sup> C NMR spectrum of <b>1</b> in CDCl <sub>3</sub> .                                                                                                                                      | SI-7 |
| <b>Fig. S13</b> <sup>13</sup> C NMR spectrum of <b>1</b> in CDCl <sub>3</sub> .                                                                                                                                      | SI-8 |
| <b>Fig. S14</b> FAB-MS spectrum of <b>1</b> .                                                                                                                                                                        | SI-8 |

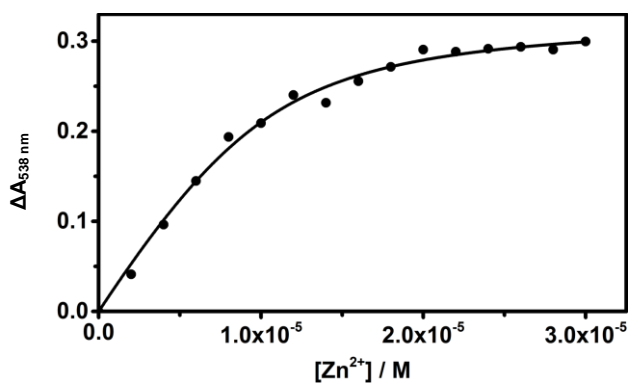

**Fig. S1.** Change in the absorbance of **1** at 538 nm upon adding incremental amount of Zn(OAc)<sub>2</sub> in EtOH. The data was acquired in 5 min after treating with Zn(OAc)<sub>2</sub>.

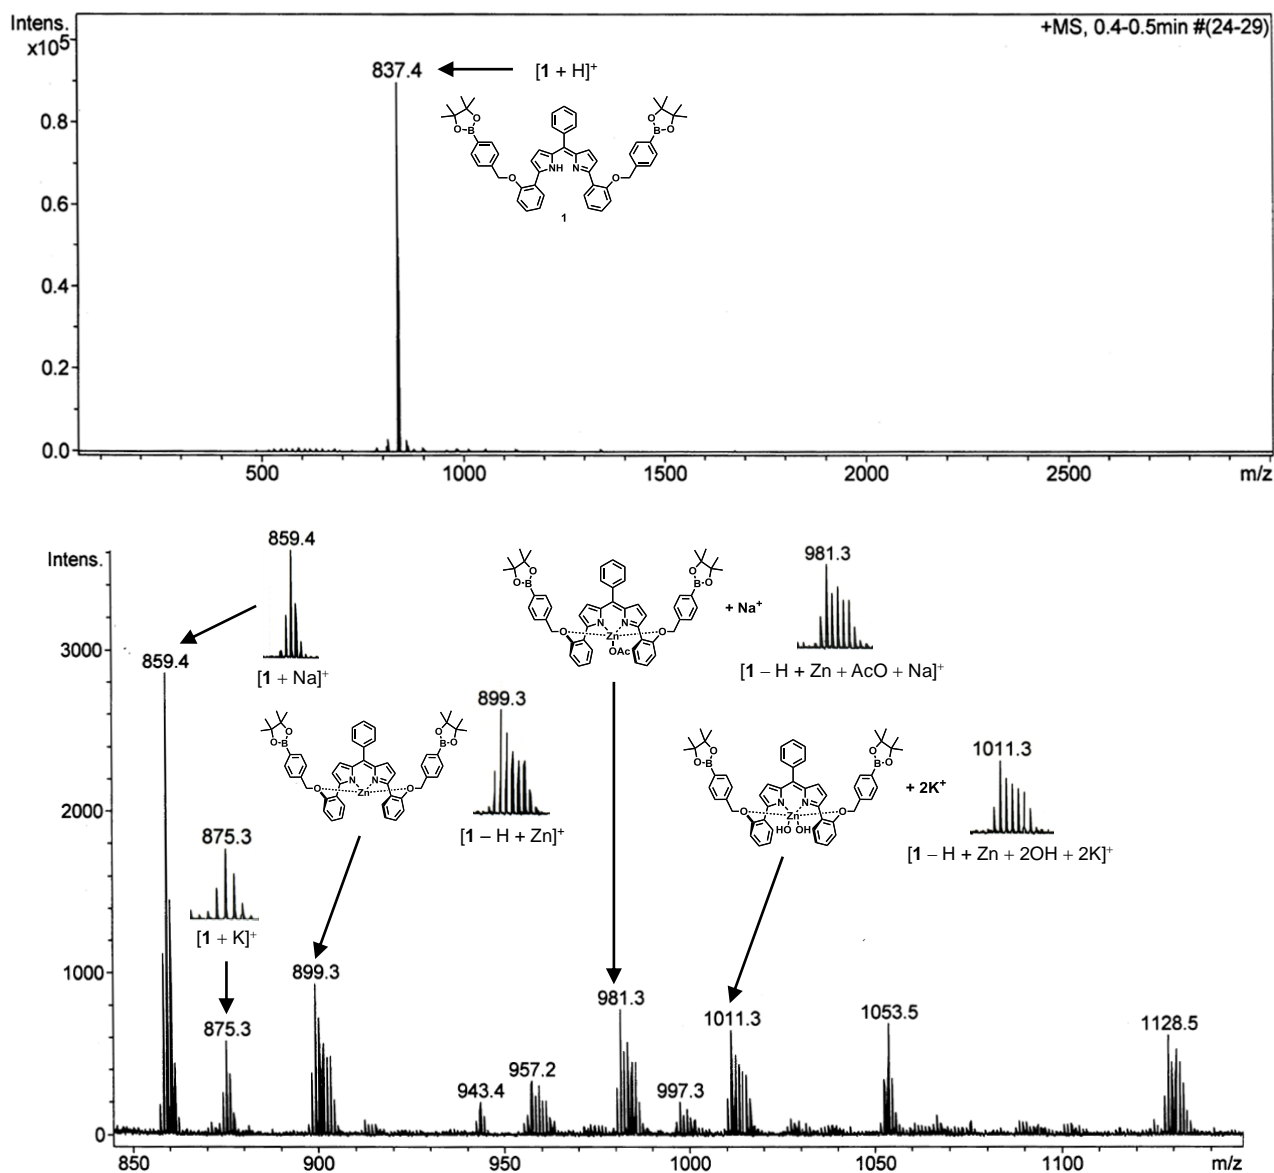

**Fig. S2.** ESI-MS spectra in the positive mode of the EtOH solution of **1** in the presence of 3 equiv. of Zn(OAc)<sub>2</sub>. The data were acquired in 5 min at 100 °C.

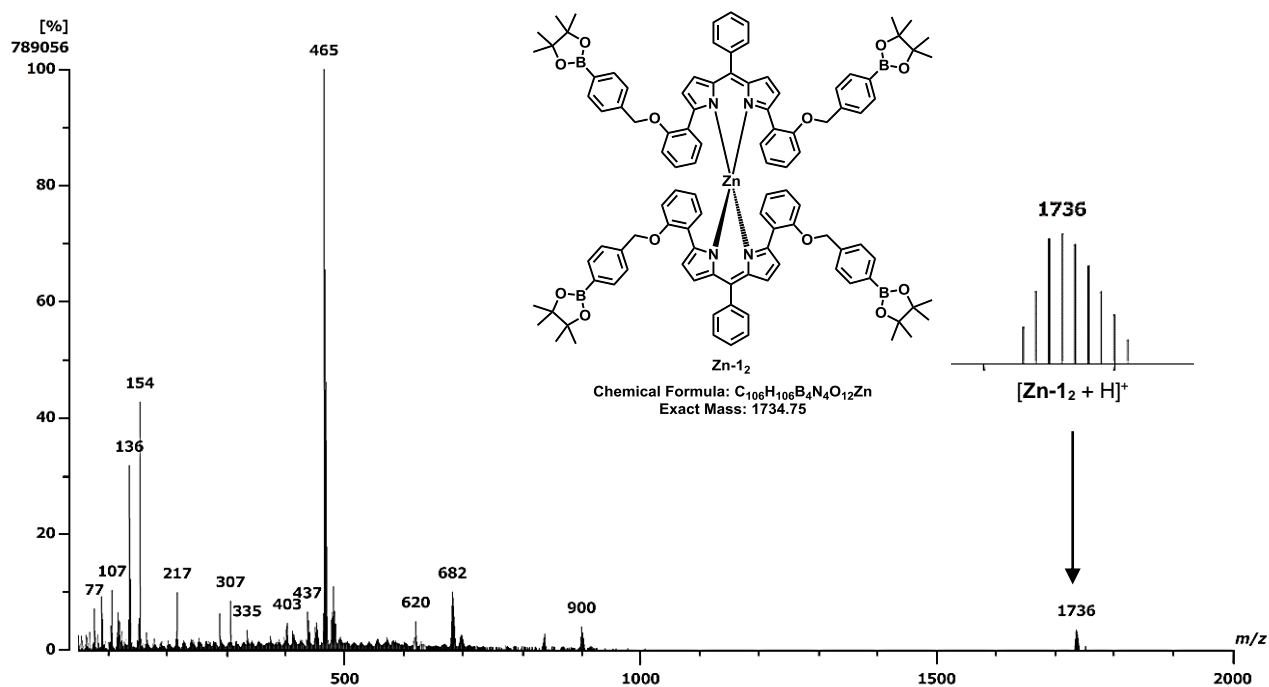

**Fig. S3.** FAB-MS spectra of solid isolated from the evaporation of EtOH solution where **1** (50  $\mu\text{mol}$ ) and  $Zn(OAc)_2$  (50  $\mu\text{mol}$ ) were dissolved. (The plausible structure of **Zn-12** has shown).

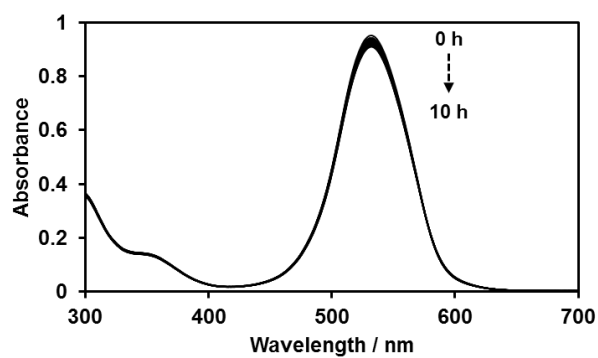

**Fig. S4.** Time-course analysis of absorption spectra of **Zn-12** (10  $\mu\text{M}$ ) as a plausible complex after adding  $H_2O_2$  (1mM) in EtOH/ $CHCl_3$  (1:1 v/v).

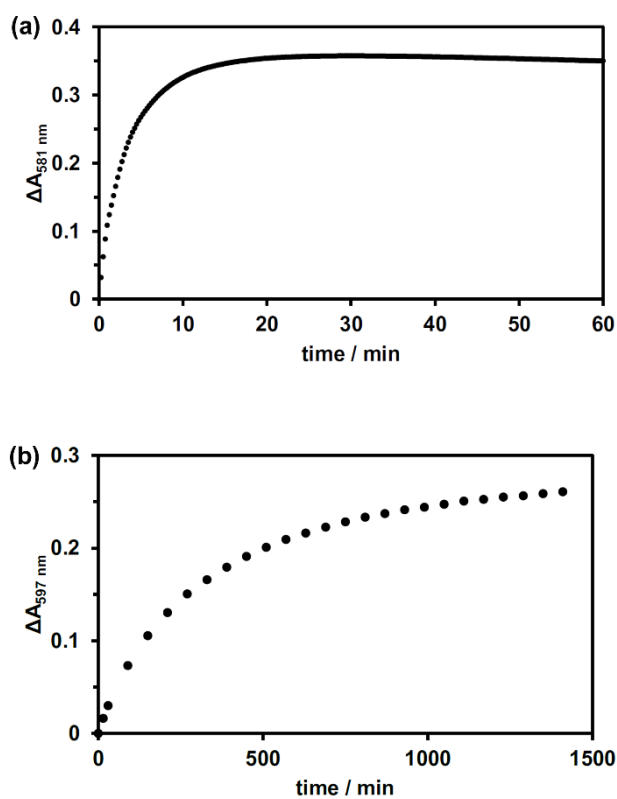

**Fig. S5.** Change in absorption intensity of **1** at 581 nm (a) and 597 nm (b) as a function of time in the presence of 3 equiv. of  $\text{Zn}(\text{OAc})_2$  after adding an excess amount of  $\text{H}_2\text{O}_2$  (1 mM) in EtOH at 25 °C.

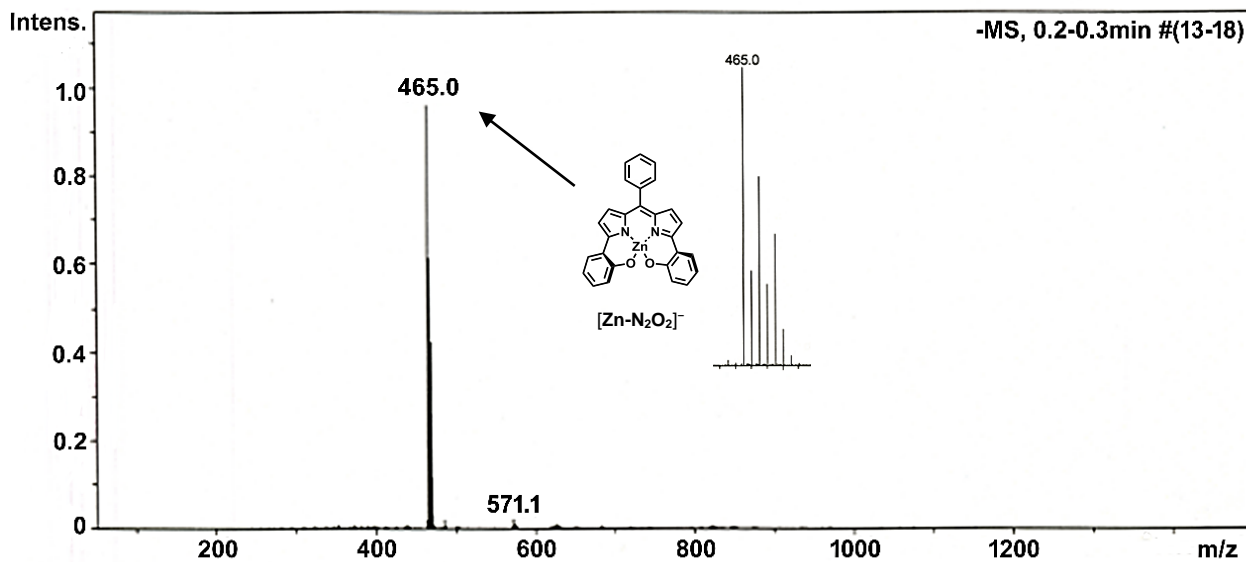

**Fig. S6.** ESI-MS spectra in the negative mode of the EtOH solution of **1** (10  $\mu\text{M}$ ) and  $\text{Zn}(\text{OAc})_2$  (30  $\mu\text{M}$ ) in 12 h after adding of  $\text{H}_2\text{O}_2$  in EtOH.

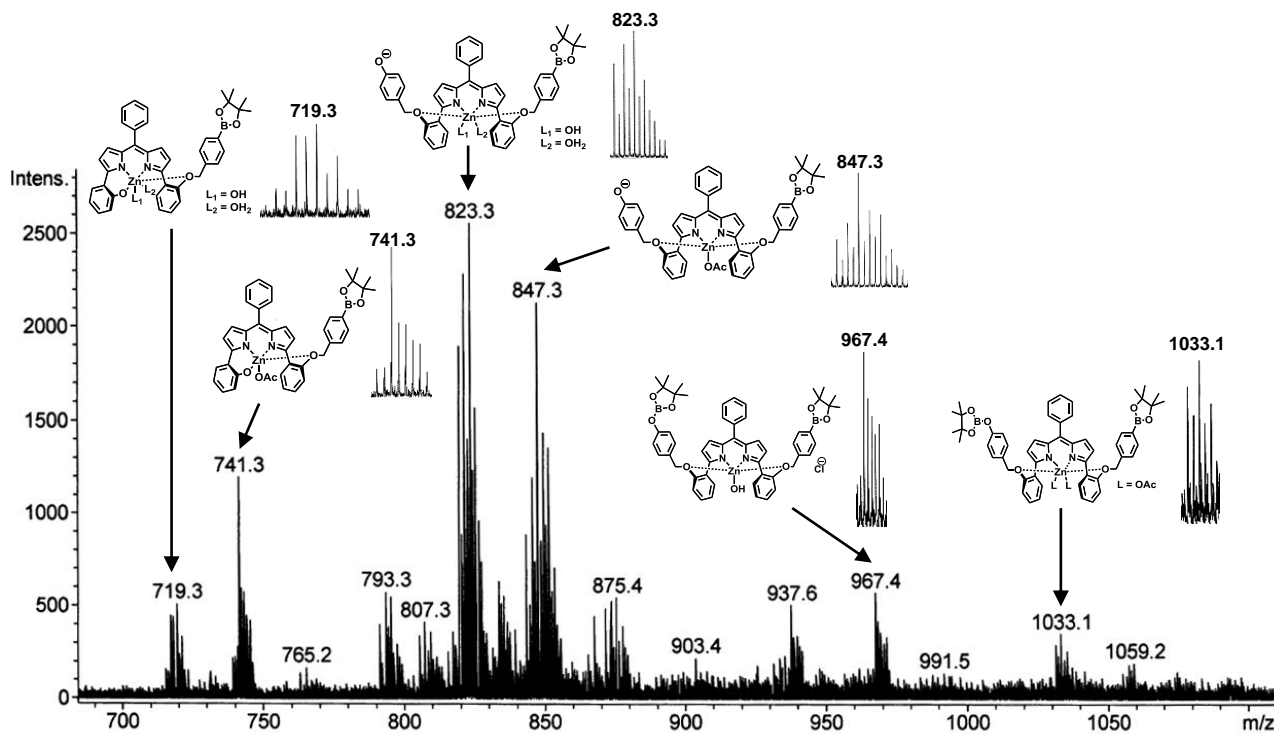

**Fig. S7.** ESI-MS spectra in the negative mode at 100 °C of the EtOH solution of **1** in the presence of 3 equiv. of Zn (OAc)<sub>2</sub> when 5 hours passed after adding H<sub>2</sub>O<sub>2</sub>.

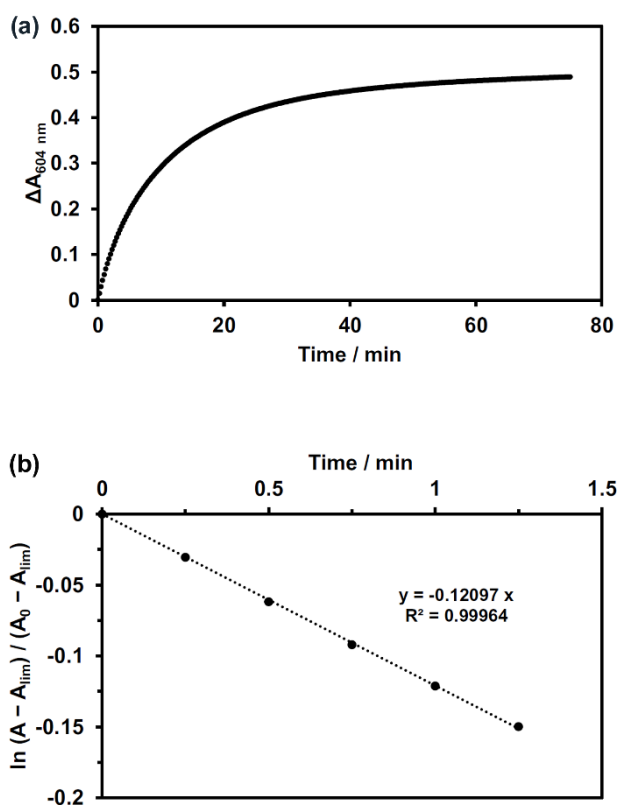

**Fig. S8.** (a) Time-dependent change in absorption band of **1** (10 μM) with Zn(OAc)<sub>2</sub> (30 μM) by adding H<sub>2</sub>O<sub>2</sub> (50 μM) in the presence of TBAOH (1 mM). (b) A plot of  $\ln(A - A_{lim}) / (A_0 - A_{lim})$  as a function of time.

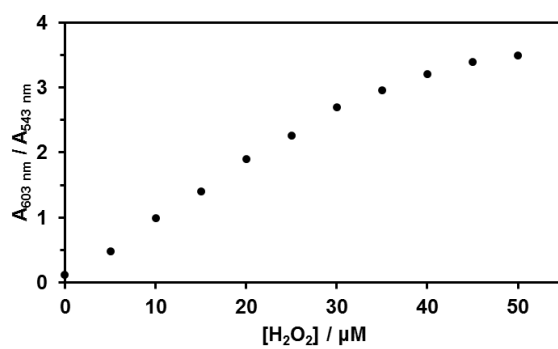

**Fig. S9.** A plot of a change in absorption intensity of **1** (10 μM) in the presence of Zn(OAc)<sub>2</sub> (30 μM) as a function of H<sub>2</sub>O<sub>2</sub> concentration added in EtOH at 25 °C. The data were acquired in 30 min after adding H<sub>2</sub>O<sub>2</sub>.

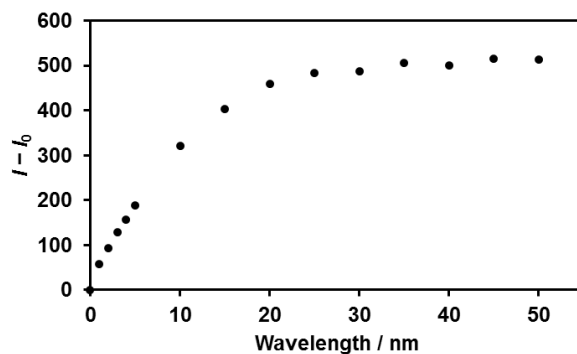

**Fig. S10.** A plot of a change in fluorescence intensity of **1** (10 μM) in the presence of Zn(OAc)<sub>2</sub> (30 μM) as a function of H<sub>2</sub>O<sub>2</sub> concentration added in EtOH at 25 °C. The data were acquired in 30 min after adding H<sub>2</sub>O<sub>2</sub>. λ<sub>ex</sub> = 564 nm.

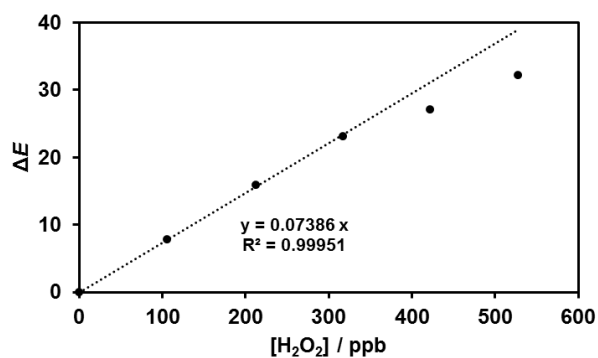

**Fig. S11.** Colorimetric response of **1** and Zn<sup>2+</sup>-coated filter paper exposed to varying amounts of H<sub>2</sub>O<sub>2</sub> vapor.  $\Delta E$  values were determined using an image-processing program. The dotted line in the graph represents the regression line obtained from dynamic range of the titration curve.

The H<sub>2</sub>O<sub>2</sub> vapor detection limit was determined by using relationship between H<sub>2</sub>O<sub>2</sub>-induced color difference ( $\Delta E$ ) and H<sub>2</sub>O<sub>2</sub> concentration (ppb) where  $\Delta E$  values were acquired using an image processing program. Standard deviation ( $\sigma$ ) of the blank measurements were determined from five individual samples to be 1.804. The regression line was obtained in dynamic range of the titration curve (**Fig. S11**), indicating 0.07386 as a slope ( $m$ ). The detection limit was then calculated from  $3\sigma/m$  to be 73.3 ppb.

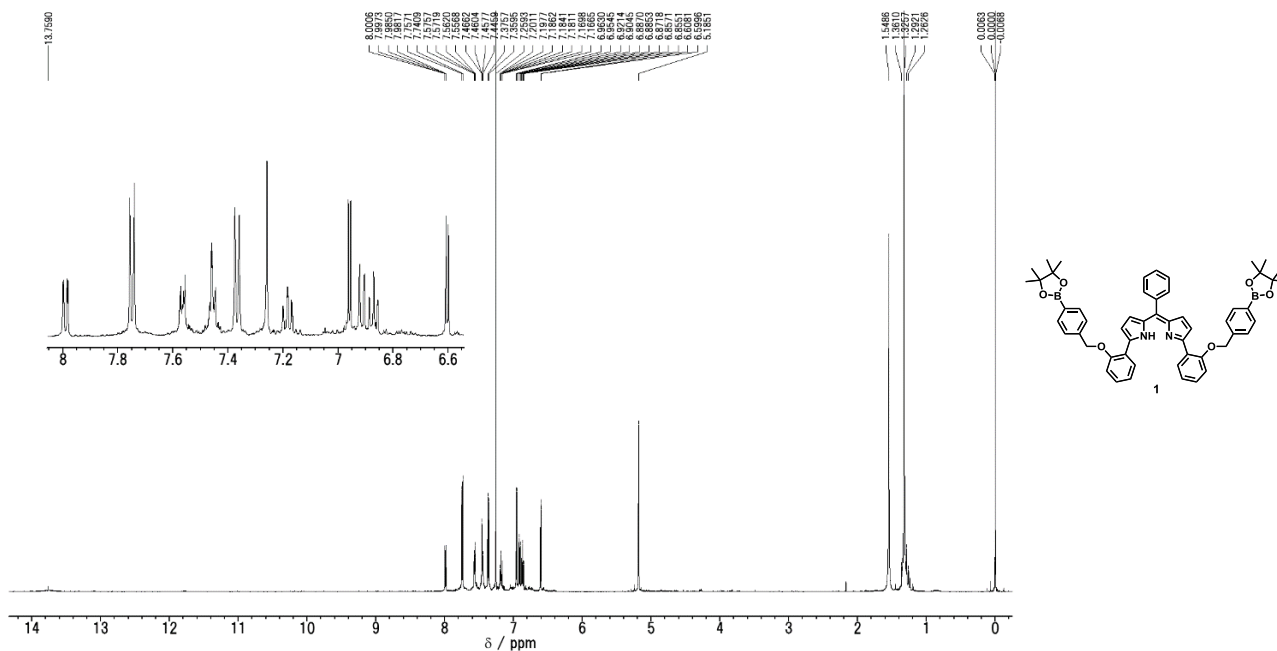

**Fig. S12.** <sup>1</sup>H NMR spectrum of **1** in CDCl<sub>3</sub>.

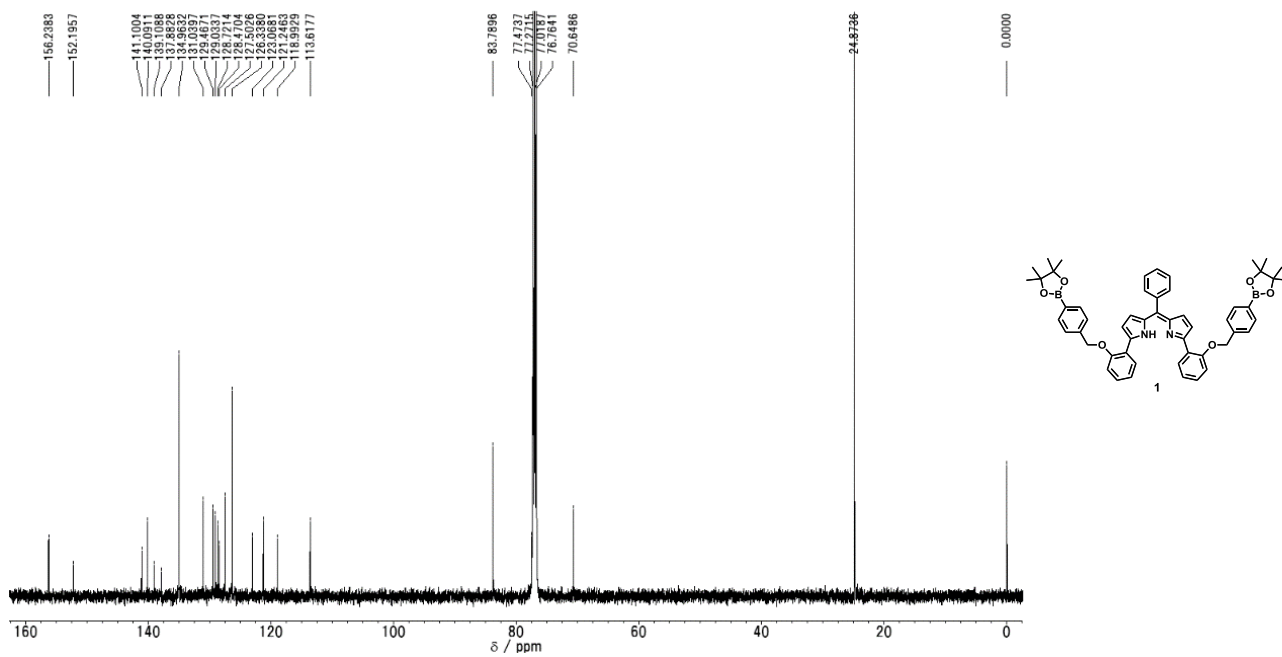

**Fig. S13.**  $^{13}\text{C}$  NMR spectrum of **1** in  $\text{CDCl}_3$ .

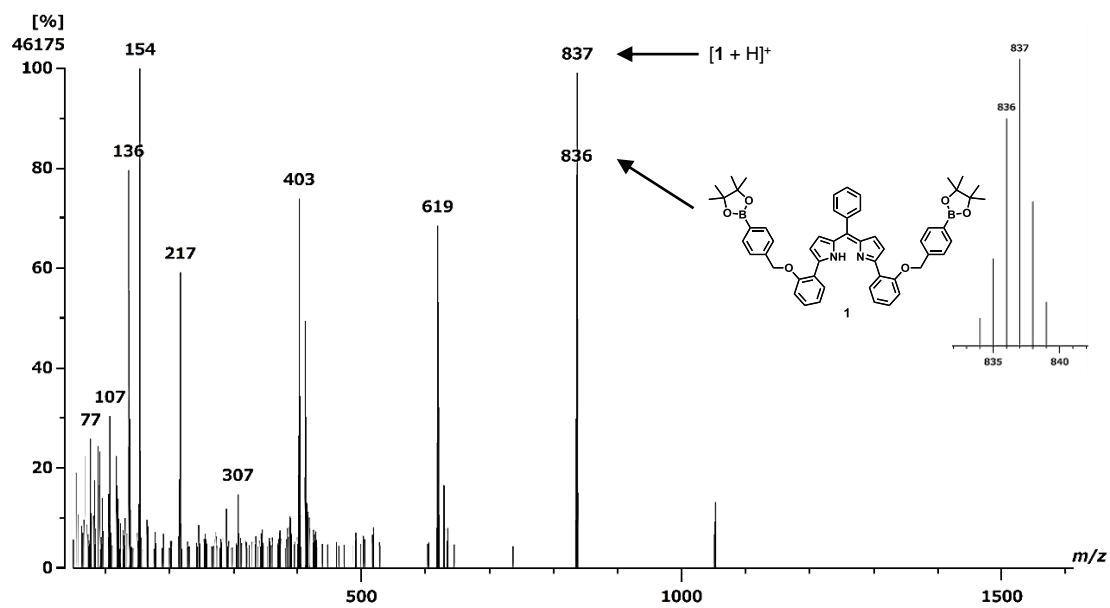

**Fig. S14.** FAB-MS spectrum in the positive mode of **1**.
